# Supplementary material for: Semimetallic electrical properties of rock salt-type LaBi thin films grown by solid-phase reaction of La/Bi multilayer precursors
Source: Royal Society of Chemistry journal article supplement (doi:10.1039/d4ce00198b), 2024-01-01
Supplement: d4ce00198b1.pdf [file d4ce00198b1.pdf]

## Supplementary Information

### **Semimetallic electrical properties of rock-salt type LaBi thin film grown by solid-phase reaction of La/Bi multilayer precursor**

Kenshin Yoshikawa,<sup>a</sup> Hideyuki Kawasoko,<sup>a,b,\*</sup> and Tomoteru Fukumura<sup>a,c,d,\*</sup>

<sup>a</sup> *Department of Chemistry, Graduate School of Science, Tohoku University, Sendai 980-8578, Japan*

<sup>b</sup> *PRESTO, Japan Science and Technology Agency, Saitama 332-0012, Japan*

<sup>c</sup> *WPI Advanced Institute for Materials Research, Tohoku University, Sendai 980-8577, Japan*

<sup>d</sup> *Center for Science and Innovation in Spintronics, Tohoku University, Sendai 980-8577, Japan*

\* [hideyuki.kawasoko.b7@tohoku.ac.jp](mailto:hideyuki.kawasoko.b7@tohoku.ac.jp)

\* [tomoteru.fukumura.e4@tohoku.ac.jp](mailto:tomoteru.fukumura.e4@tohoku.ac.jp)

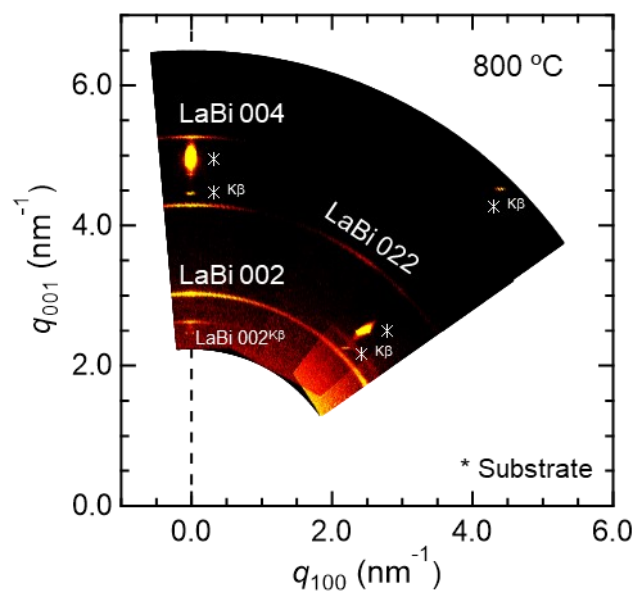

**Fig. S1** Two-dimensional X-ray diffraction pattern for LaBi thin film with  $T_g = 800$  °C.

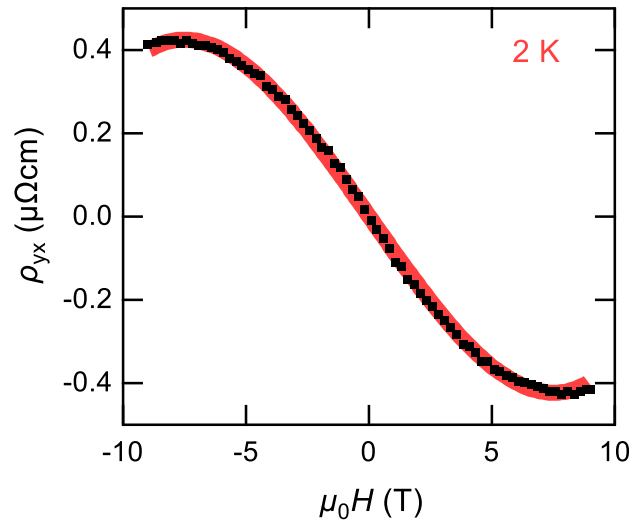

**Fig. S2** Magnetic field dependence of Hall resistivity for LaBi thin film at 2 K. Red curve denotes the fitting result using two-carrier model.

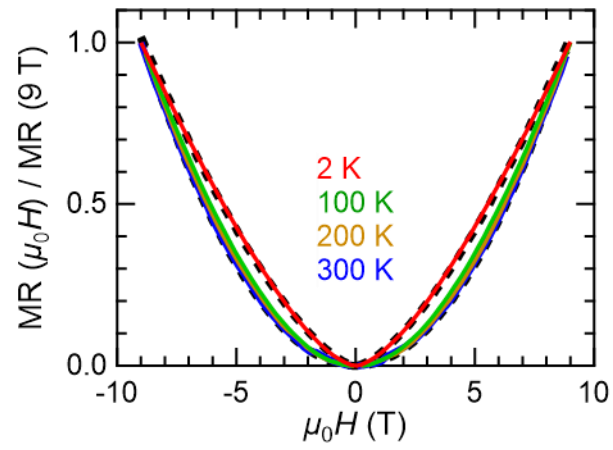

**Fig. S3** Normalized magnetoresistance (MR) at 2, 100, 200, and 300 K. Dashed curves denote fitting results with  $(\mu_0 H)^{1.5}$  and  $(\mu_0 H)^2$  dependence for 2 K and 100–300 K, respectively.

**Table. S1** Electron carrier density ( $n_e$ ), hole carrier density ( $n_h$ ), electron mobility ( $\mu_e$ ), and hole mobility ( $\mu_h$ ) for LaBi.

|                 | $n_e$ (/cm <sup>3</sup> ) | $n_h$ (/cm <sup>3</sup> ) | $\mu_e$ (cm <sup>2</sup> /Vs) | $\mu_h$ (cm <sup>2</sup> /Vs) | Ref. |
|-----------------|---------------------------|---------------------------|-------------------------------|-------------------------------|------|
| This study (2K) | $1.11 \times 10^{20}$     | $1.25 \times 10^{20}$     | $5.77 \times 10^2$            | $5.26 \times 10^2$            | -    |
| Bulk (2 K)      | $6.12 \times 10^{19}$     | $6.09 \times 10^{19}$     | $5.68 \times 10^3$            | $5.88 \times 10^3$            | 1    |
| Bulk (2 K)      | $6.0(4) \times 10^{20}$   | $6.0(3) \times 10^{20}$   | $2.6(1) \times 10^4$          | $3.1(1) \times 10^4$          | 2    |
| Bulk (2 K)      | $7.62 \times 10^{20}$     | $7.56 \times 10^{20}$     | $1.75 \times 10^4$            | $1.89 \times 10^4$            | 3    |
| Bulk (5 K)      | $2 \times 10^{19}$        | $1.9 \times 10^{19}$      | $1.28 \times 10^4$            | $1.26 \times 10^4$            | 4    |

## References in Supplementary Information

- 1 F. F. Tafti, Q. D. Gibson, S. Kushwaha, J. W. Krizan, N. Haldolaarachchige, R. J. Cava, *Proc. Natl. Acad. Sci.*, 2016, **113**, E3475.
- 2 S. Sun, Q. Wang, P.-J. Guo, K. Liu, H. Lei, *New J. Phys.*, 2016, **18**, 082002.
- 3 N. Kumar, C. Shekhar, S.-C. Wu, I. Leermakers, O. Young, U. Zeitler, B. Yan, C. Felser, *Phys. Rev. B*, 2016, **93**, 241106(R).
- 4 R. Singha, B. Satpati, P. Mandal, *Sci. Rep.*, 2017, **7**, 6321.
